# Supplementary material for: The P2X7 receptor localizes to the mitochondria, modulates mitochondrial energy metabolism and enhances physical performance
Source: bioRxiv or medRxiv preprint supplement (doi:10.1101/2020.09.18.303511), 2020-09-18
Supplement: Supplementary file [file media-2.pdf]

**Supplementary Table I**

|                                   | <b>MEF WT</b>     | <b>MEF P2X7-KO</b> | <b>Unpaired t test</b>    |
|-----------------------------------|-------------------|--------------------|---------------------------|
| <b>Basal Respiration</b>          | 376,0 ± 25,77 N=3 | 258,7 ± 33,33 N=3  | P value= 0,0496<br>d.f= 4 |
| <b>ATP Production</b>             | 302,7 ± 28,10 N=3 | 195,0 ± 25,94 N=3  | P value= 0,0481<br>d.f= 4 |
| <b>Maximal Respiratory Rate</b>   | 769,3 ± 104,9 N=3 | 305,7 ± 37,17 N=3  | P value= 0,0141<br>d.f= 4 |
| <b>Spare Respiratory Capacity</b> | 434,7 ± 89,89 N=3 | 82,67 ± 3,180 N=3  | P value= 0,0173<br>d.f= 4 |
| <b>Uncoupling Level</b>           | 68,67 ± 7,172 N=3 | 63,67 ± 10,84 N=3  | n.s                       |

|                                   | <b>N13 WT</b>     | <b>N13 R</b>      | <b>Unpaired t test</b>    |
|-----------------------------------|-------------------|-------------------|---------------------------|
| <b>Basal Respiration</b>          | 938,7 ± 82,60 N=3 | 143,3 ± 48,46 N=3 | P value= 0,0011<br>d.f= 4 |
| <b>ATP Production</b>             | 816,7 ± 59,89 N=3 | 313,0 ± 114,6 N=3 | P value= 0,0176<br>d.f= 4 |
| <b>Maximal Respiratory Rate</b>   | 4025 ± 300,9 N=3  | 1565 ± 243,7 N=3  | P value= 0,0031<br>d.f= 4 |
| <b>Spare Respiratory Capacity</b> | 3087 ± 318,2 N=3  | 1421 ± 212,8 N=3  | P value= 0,0121<br>d.f= 4 |
| <b>Uncoupling Level</b>           | 221,3 ± 13,87 N=3 | 171,0 ± 84,54 N=3 | n.s                       |

|                                   | <b>Microglia WT</b> | <b>Microglia P2X7KO</b> | <b>Unpaired t test</b>    |
|-----------------------------------|---------------------|-------------------------|---------------------------|
| <b>Basal Respiration</b>          | 616,3 ± 96,67 N=3   | 248,3 ± 4,096 N=3       | P value= 0.0191<br>d.f= 4 |
| <b>ATP Production</b>             | 597,0 ± 72,11 N=3   | 239,0 ± 7,234 N=3       | P value= 0,0078<br>d.f= 4 |
| <b>Maximal Respiratory Rate</b>   | 1663 ± 257,5 N=3    | 435,3 ± 14,62 N=3       | P value= 0,0089<br>d.f= 4 |
| <b>Spare Respiratory Capacity</b> | 1381 ± 118,6 N=3    | 188,0 ± 10,26 N=3       | P value= 0.0006<br>d.f= 4 |
| <b>Uncoupling Level</b>           | 57,00 ± 1,155 N=3   | 9,333 ± 3,383 N=3       | P value=0.0002<br>d.f=4   |

|                                   | <b>HEK293-P2X7</b> | <b>HEK293</b>     | <b>Unpaired t test</b>     |
|-----------------------------------|--------------------|-------------------|----------------------------|
| <b>Basal Respiration</b>          | 107,9 ± 5,974 N=6  | 78,57 ± 3,205 N=7 | P value=0,0009<br>d.f=11   |
| <b>ATP Production</b>             | 73,81 ± 5,487 N=6  | 51,30 ± 2,350 N=7 | P value= 0,0021<br>d.f= 11 |
| <b>Maximal Respiratory Rate</b>   | 156,7 ± 11,76 N=6  | 93,69 ± 3,845 N=7 | P value= 0,0002<br>d.f= 11 |
| <b>Spare Respiratory Capacity</b> | 48,78 ± 8,730 N=6  | 15,12 ± 4,040 N=7 | P value= 0,0036<br>d.f= 11 |
| <b>Uncoupling Level</b>           | 34,10 ± 0,8806 N=6 | 27,27 ± 1,630 N=7 | P value=0,0049<br>d.f=11   |

**Supplementary Table II**

|                       | <b>CTRL</b>          | <b>BzATP</b>          | <b>Unpaired t test</b>      |
|-----------------------|----------------------|-----------------------|-----------------------------|
| CTRL vs. BZATP 10 min | 0,7487 ± 0,02080 N=7 | 0,8478 ± 0,01876 N=10 | P value = 0,0033<br>d.f=15  |
| CTRL vs. BZATP 1 H    | 0,7487 ± 0,02080 N=7 | 0,9293 ± 0,02230 N=8  | P value = 0,0001<br>d.f= 13 |
| CTRL vs. BZATP 6H     | 0,7487 ± 0,02080 N=7 | 0,8801 ± 0,02092 N=11 | P value = 0,0006<br>d.f= 16 |

|                          | <b>CTRL</b>          | <b>Rotenone</b>       | <b>Unpaired t test</b>      |
|--------------------------|----------------------|-----------------------|-----------------------------|
| CTRL vs. Rotenone 10 min | 0,7487 ± 0,02080 N=7 | 0,7877 ± 0,02371 N=7  | n.s                         |
| CTRL vs. Rotenone 1 H    | 0,7487 ± 0,02080 N=7 | 0,8836 ± 0,008011 N=7 | P value = 0,0001<br>d.f= 12 |
| CTRL vs. Rotenone 6H     | 0,7487 ± 0,02080 N=7 | 0,7639 ± 0,05414 N=7  | n.s                         |

|                                               | <b>CTRL</b>          | <b>H<sub>2</sub>O<sub>2</sub></b> | <b>Unpaired t test</b>      |
|-----------------------------------------------|----------------------|-----------------------------------|-----------------------------|
| CTRL vs. H <sub>2</sub> O <sub>2</sub> 10 min | 0,7487 ± 0,02080 N=7 | 0,8720 ± 0,01481 N=8              | P value = 0,0003<br>d.f=13  |
| CTRL vs. H <sub>2</sub> O <sub>2</sub> 1 H    | 0,7487 ± 0,02080 N=7 | 0,7936 ± 0,02162 N=7              | n.s                         |
| CTRL vs. H <sub>2</sub> O <sub>2</sub> 6H     | 0,7487 ± 0,02080 N=7 | 0,8716 ± 0,01225 N=7              | P value = 0,0003<br>d.f= 12 |
